1 **Three Decades as an NSF REU Site: Lessons and Recommendations**

2 **Authors:**

3 Andrew L. McDevitt<sup>1,2</sup>

4 Manisha V. Patel<sup>1</sup>

5 Aaron M. Ellison<sup>1</sup>

6 **Authors' addresses:**

7 1. Harvard Forest, Harvard University

8 324 North Main Street

9 Petersham, MA 01366

10 2. Department of Integrative Biology, University of Colorado Denver

11 Campus Box 171, P.O. Box 173364

12 Denver, CO 80217-3364

13 **Corresponding author:** Aaron M. Ellison; [aellison@fas.harvard.edu](mailto:aellison@fas.harvard.edu)

14 **Keywords:** research experiences for undergraduates (REU), undergraduate research experience

15 (URE), Harvard Forest, STEM, cultural-historical activity theory (CHAT),

## 16 **Abstract**

17           For the past 30 years, the NSF's Research Experiences for Undergraduates (REU)  
18 program has supported thousands of undergraduate researchers annually. Each REU site operates  
19 independently with regards to their research mission and structure, leading to a complex  
20 educational milieu distinct from traditional classrooms and labs. Overall, REU sites are  
21 perceived as highly formative experiences for developing researchers. However, even with  
22 improved assessment practices over the past decade, best practices for student learning and long-  
23 term impact are limited. To address this limitation, we recommend the use of cultural historical  
24 activity theory (CHAT) as a unifying framework to study these diverse programs. CHAT  
25 provides guidance for the collection of qualitative information which can help characterize REU  
26 programs in an educationally meaningful context. Adoption of CHAT by REU sites would  
27 improve dialogue among interdisciplinary programs. Such networks could further incentivize  
28 collaboration with discipline based education researchers and result in improved evidence-based  
29 practices.

30

## 31 **Improving Evidence-based Practices for REU Programs**

32           Since 1987, the US National Science Foundation (NSF) has supported undergraduate  
33 research experiences (UREs) for thousands of undergraduates each year through its Research  
34 Experiences for Undergraduates (REU) program (Box 1). At various times during these 30 years,  
35 NSF has developed assessment tools and examined assessment data across REU sites, but  
36 empirical evidence of impacts of these programs on further educational attainment or  
37 employment in science, technology, engineering, and mathematics (STEM) fields remains  
38 limited [1, 2]. Harvard University established its Summer Research Program in Ecology at the

39 Harvard Forest (HF-SRPE) in 1985; NSF has provided continuous core support for the HF-SRPE  
40 since 1989.

41 Through nearly three decades, HF-SRPE has participated in the development and  
42 implementation of NSF's vision for REU sites. Simultaneously, we have enhanced student  
43 experiences and improved short- and long-term effectiveness of our program by regularly  
44 measuring and reflecting on its success and failures, and integrating our assessment data with  
45 REU-wide evaluations. Based on our experiences, we here advocate for greater integration of  
46 educational theory, notably cultural-historical activity theory (CHAT), to increase the efficiency  
47 by which REU sites use assessment data to improve their own programs. Increased dialogue  
48 among programs and sharing of administrative procedures and data will strengthen educational  
49 research collaborations across various programs and disciplines.

50

## 51 **History of REU programs**

52 Undergraduate research experiences are widely accepted as a way to strengthen student  
53 preparation within scientific disciplines by providing authentic opportunities in research  
54 laboratories [3]. One of the first programs to support these experiences was the Undergraduate  
55 Research Participation Program (URP), which NSF began in 1958 and eliminated in 1982  
56 because of cuts in its education budget [4]. In 1987, NSF initiated the Research Experiences for  
57 Undergraduates (REU) program, following the paid internship model of URP. Since then, NSF  
58 has been one of the largest supporters of undergraduate research programs, investing \$1.12  
59 billion in funding between 2002 and 2017 (Figure 1). In the early 2000s, the education research  
60 literature began to reveal the utility of undergraduate research programs for recruiting women [5,  
61 6] and minority students into STEM fields [7-9]. In 2003, NSF aligned REU program goals with

62 these new findings and outlined REU funding priorities in their yearly congressional budgets  
63 (Figure 1A). The implementation of the America COMPETES Act of 2010 (P.L. 111-478 §514)  
64 strengthened initiatives to reach diverse participants, especially from institutions where STEM  
65 research opportunities are limited. It also mandated the tracking of participants for STEM  
66 matriculation and employment for at least three years following graduation. Around the same  
67 time, the Biology REU Leadership Committee began using a common assessment tool, the  
68 Undergraduate Research Student Self-Assessment [10] (URSSA), to evaluate common goals and  
69 improve communication about BIO-REU programs [11].

70

## 71 **REU Sites are Unique Educational Settings**

72 Individual REU sites are defined by their intellectual themes and the community of  
73 researchers that they bring together. Although a primary goal of the REU program is to prepare  
74 undergraduate students for careers in STEM fields by provide scientific and engineering research  
75 opportunities, the design of these educational experiences depends on the goals and values of  
76 each site. Sites vary based on their personnel, infrastructure, their intellectual pursuits, and the  
77 student populations they serve.

78 For example, the Harvard Forest is a 2500-ha ecological field station located in rural  
79 Massachusetts. Our physical isolation poses many logistical challenges for students living and  
80 working together. Feedback from our participants over the past three decades has revealed the  
81 importance of physical infrastructure, organizational structure, and cultural norms on student  
82 perception of their educational experience in our program. Recognizing a heightened need for  
83 student support, we developed structured actives and resources for our students. Many of these  
84 are ancillary to what scientific researchers view as the core scientific mission of an REU

85 program, but they are essential for developing the soft skills and personal connections important  
86 for future success in STEM fields [12, 13].

87 Adding to the variation among programs is the interdisciplinary nature of many of them.  
88 Individual scientific and engineering disciplines often have different educational priorities,  
89 knowledge requirements, skillsets, and practices. However, it cannot be assumed that the  
90 learning experiences of students within an interdisciplinary program can be evaluated using the  
91 same tools that are used in discipline-based classrooms and labs where students participate in  
92 similar activities.

93

#### 94 **Evaluating Program Goals**

95 Evaluation of students and programs can be done quantitatively or qualitatively. At first  
96 glance, quantitative data seems to be simple to collect and analyze with common statistical  
97 techniques, and the results can be scaled up from small samples to large populations. However,  
98 the apparent simplicity of numerical results often masks many latent conceptual elements.  
99 Qualitative information is used to elicit meaning from the data and reveal structures underlying  
100 them.

101 Prior to the adoption of URSSA, each individual REU sites selected and managed its own  
102 assessment protocol. During this time, assessment consisted of single-site case studies [14],  
103 internally developed surveys [15], and participant surveys [16]. Qualitative data elicited  
104 insightful findings about student experiences, but were resource intensive to collect and did not  
105 represent all programs. Quantitative surveys created less of a burden on programs and were  
106 widely used [2], but the surveys often consisted of conceptually ambiguous responses and,

107 because they were developed by individual programs for internal use, rarely validated, and were  
108 not comparable across programs [2, 15].

109 REU site program directors (PDs) routinely are scientists with strong backgrounds in  
110 basic scientific research but often lack experience in designing and implementing assessments of  
111 complex learning environments. Although intimately familiar with the challenges facing their  
112 programs, REU PDs not well-versed in discipline-based educational research run the risk of  
113 expending unnecessary effort trying to reinvent analytical wheels [2], incorrectly apply  
114 qualitative and quantitative techniques [17], or violate ethical guidelines of research involving  
115 human subjects. Additionally, the often ephemeral nature of REU site funding (many programs  
116 last < 5 yrs) combined with small sample sizes (averaging between 8–10 participants/yr) have  
117 made it difficult to establish broad claims about the effectiveness and impact of REU programs.  
118 Although we encourage increased collaboration and data sharing among REU sites, such  
119 collaborations should revolve around educationally meaningful characteristics such as program  
120 goals, mentorship models, professional development opportunities, and research cultures rather  
121 than research disciplines or types of institutions. The former also are likely to be more likely to  
122 engage successfully with discipline-based education researchers.

123

#### 124 **Trial and Error Approach to Science Education**

125 In addition to the challenges of evaluating various aspects of REU programs, we have  
126 observed that many REU programs—and especially newly funded ones—go through many  
127 growing pains as new evaluative practices are implemented. Although reflection on these  
128 practices is important for each program, it leads to unnecessary and costly redundancy that could

129 be avoided by the implementation of established best practices. A clearinghouse of such best  
130 practices is lacking, so we provide an example that we revisit throughout the paper.

131 At HF-SRPE, we rely on both formal (surveys and interview protocols) and informal  
132 (conversations with students) evaluations to assess and improve our program. These evaluations  
133 are used both to tweak parts of the program on the fly and to suggest future programmatic  
134 improvements. For example, conversations with students within the first three weeks of our 11-  
135 week program revealed that many the students lacked a clear understanding of why they were  
136 doing the “things their mentor told them to do,” despite perceived efforts by their mentors to  
137 communicate the “big picture” of research projects. This uncertainty created high levels of stress  
138 among the students, who only four weeks later had to write formal abstracts of their research  
139 projects and subsequently present them in a summer research symposium. In 2012, a few  
140 mentors, acting on their own, introduced their projects by asking their mentees to write short (1–  
141 2-page) research proposals outlining their summer research. These mentors used these proposals  
142 to evaluate the degree to which the students really understood the project, opened additional  
143 opportunities for discussions about the research between students and mentors, and resulted in  
144 substantial improvements in students’ performance while reducing their anxiety.

145 Given the success of this initial informal effort, all our students now write a two-page  
146 research proposal on their summer projects after two weeks of daily, intensive field, lab, and  
147 library work with their mentors. The proposal provides the students with a road map of their  
148 summer research, facilitates discussion between the mentors and students on the overall summer  
149 research, encourages them to read the scientific literature, and has them writing scientific prose  
150 from the first day of the program. The program coordinator and program director use the

151 research proposal to identify and provide additional support to students that are struggling with  
152 their research.

153         After four years of using this method, we have obtained substantial feedback from  
154 students and mentors on its effectiveness. Although the research proposal itself provides a  
155 valuable guide for the summer research, once written it has been rarely re-visited by either  
156 students or mentors, even during preparation of the students' final research presentations. We  
157 now are considering asking students to revisit their research proposal and convert it into a longer  
158 written report that includes not only background and theory but also methods, results, and a brief  
159 discussion. Such a report not only will provide students with a tangible product of their summer  
160 experience and is a good exercise in scientific writing, but also represents an archivable, written  
161 record of their summer work that could be developed by the student and mentor into a more  
162 formal manuscript. Indeed, 15% of our students since 2001 have co-authored and published peer-  
163 reviewed papers with their mentors [14].

164         The use (or lack thereof) of statistics by the students in their final, oral presentations also  
165 revealed that their research proposal was not serving as a "living document" throughout the  
166 summer. We have always encouraged mentors and students to discuss, learn, and work with  
167 statistics at all stages of the summer research, from sampling or experimental design through  
168 data collection and analysis. However, we have seen that students rarely would broach statistical  
169 topics with their mentors. While students waited for mentors to initiate these discussion, mentors  
170 rarely mentioned statistics until data had been collected, organized, and were ready for analysis.  
171 Then, students would scramble anxiously in the last one or two weeks to learn and understand  
172 the statistical methods they needed to analyze their data. We used these observations and  
173 discussions with students to develop a multi-session workshop on the R statistical language [15].



174 Although we do not teach statistics per se, as different methods are needed for different projects,  
175 introducing R early in the program gets students thinking about data, gives them comfort with a  
176 software tool, and most importantly, empowers them to initiate discussions of statistical  
177 questions with their mentors. This workshop continually receives strongly positive reviews in the  
178 post-program survey.

179

### 180 **Transferability of Best Practices**

181 To apply the lessons from our previous example, it is important to identify the various  
182 stakeholders (student, mentors, program staff); contextualize the learning environments before,  
183 during, and after the implementation of new practices; and often change our own perspective  
184 about the meaning of “success”. In our example, we have viewed changes in practice through the  
185 eyes of the PD. Measures of success could differ if our focus was on research outcomes by  
186 mentoring faculty or on critically understanding student learning. Depending on the  
187 circumstances or goals of an REU site, it is likely to be necessary to draw upon a certain  
188 perspective of a practice to apply it to a new situation. To do so efficiently requires an agreed  
189 upon schema to document and share programmatic information.

190

### 191 **The Need for a Common Theoretical Framework**

192 The flexibility afforded to REU sites by NSF encourages innovative pedagogical  
193 approaches but also increases the heterogeneity across programs as compared to traditional  
194 classroom settings. Perhaps the largest methodological limitation for studying experiences and  
195 outcomes of undergraduate researchers is that our assessment tools were developed without any  
196 overarching theoretical framework: an explicit statement of our theoretical assumptions with

197 respect to learning. Rather, our surveys were developed with specific programmatic goals in  
198 mind. Although the surveys served their intended purpose, the lack of theory and abstraction  
199 limits our ability to relate our findings to the broader literature on education and outcomes or to  
200 compare them meaningfully to data from other REU sites. We experienced this same limitation  
201 when examining 10 years of HF-SRPE pre-post surveys [14]. Although we could predict  
202 difference in various learning gains based upon prior experiences, we had limited ability to  
203 explain the phenomena we observed. The design of our short self-reporting survey was an  
204 intentional compromise between sample size and survey depth, and such concessions contribute  
205 to a lack a general mechanistic understanding of outcomes of UREs [2].

206

### 207 **Cultural Historical Activity Theory (CHAT) as a Broad Theoretical Framework**

208 To unify the study of UREs, we propose using the meta-theoretical framework of  
209 Cultural Historical Activity Theory (CHAT). CHAT allows researchers to study the social  
210 construction of knowledge by examining both individual and collaborative activities [16]. CHAT  
211 uses a systems perspective to provide a blueprint describing the components that influence the  
212 social construction of knowledge [17]. This systems approach to research has proven useful for  
213 studying complex and heterogeneous educational phenomena and helps to derive meaning from  
214 seemingly contradictory information [18].

215 Originated by Vygotsky in the 1930's, the current "third generation" of CHAT activity  
216 systems are best visualized through what are known as activity triangles [16]. CHAT requires the  
217 acknowledgement of seven distinct elements ("nodes") that take part in an activity within a  
218 system of interest and the examination of connections ("edges") between them [16] (Figure 2):

219 1. *Subject* – The individual or group of focus during the specified activity;

- 220           2. *Object* – The goal or motive behind the specified activity;
- 221           3. *Rules* – The stated or unstated rules that govern how individuals act within the
- 222                 context of the specified activity;
- 223           4. *Community* – The social context in which the specified activity is conducted;
- 224           5. *Division of labor* – How tasks are shared among the community to accomplish the
- 225                 specified activity;
- 226           6. *Mediating artifacts* – The tools used in creating the *Object*;
- 227           7. *Outcome* – The effect generated by subject working in concordance with other
- 228                 components of the activity system to accomplish the *Object*.

229           The nodes of the triangles represent these elements and the edges represent interactions

230   between them [17, 19].

231           REU programs are complex social learning environments and CHAT also provides the

232   ability to make sense of contradictory information that arises within the system and through time

233   [17]. These contradictions, which often are difficult to rationalize using other frameworks, are

234   classified into four types: *Primary contradictions* (1°) exist within an element (*e.g.*, contradictory

235   *Rules*); *Secondary contradictions* (2°) exist within interactions between two elements (*e.g.*,

236   *Division of labor* is not aligned with *Mediating artifacts*); *Tertiary contradictions* (3°) are

237   contradictions manifested during temporal transitions of an activity system (*e.g.*, mentors

238   refining their approach during the program); *Quaternary contradictions* (4°) exist between

239   similar activity systems of which the subject is a member (*e.g.*, REU experience compared to

240   scientific coursework) [20].

241           CHAT can help make sense of the complex social learning environment across the many

242   levels of organization characteristic of REU programs. Part of the reason evidence supporting the

243 benefit of undergraduate research experiences is limited results from the difficulty in defining  
244 similarities and differences among different programs [2]. Small sample sizes within programs  
245 (averaging 8-10 participants) and ephemeral funding also make it difficult to establish lasting  
246 partnerships with education researchers whose experience in survey instrument selection and  
247 evaluative techniques that would benefit classically trained scientists. By characterizing  
248 programs using CHAT, we can envision examining system components of UREs and provide a  
249 platform for education researchers to connect with multiple program directors whose programs  
250 share common characteristics.

### 251 *Values of the program experience*

252 Primary contradictions within the CHAT framework are often a result of differing value  
253 judgements that underlie the system [20]. These contradictions are fundamental to the system  
254 and form the foundation of higher orders of contradictions [20, 21]. One primary contradiction  
255 that we see in REU programs is the balance between the participant's role as a learner of the  
256 nature of scientific practice and her role as an independent researcher. Vygotsky's "zone of  
257 proximal development" (ZPD) highlights this contradiction: it is the zone between an  
258 individual's ability to complete a task unaided and an individual's inability to complete a task  
259 even with assistance [22]. The ZPD is the middle ground in which tasks can be completed  
260 through social guidance and scaffolding [22]. To conduct research successfully, an independent  
261 researcher must master specific sets of skills, including hypothesis generation, problem solving,  
262 analytical techniques, and scientific writing and communication. Participating in mentored  
263 research provides students with the opportunity to learn from independent researchers while  
264 working towards a common research goal. Assigning tasks too far beyond the capacity of the  
265 participant inhibits learning from occurring and prevents research from progressing. Assigning

266 tasks that a participant can accomplish unaided promotes research productivity, but assigning too  
267 many such tasks limits the student's potential to learn. Designing a program that facilitates the  
268 transition from novice to independent researcher while also generating research products requires  
269 a careful balance between tasks within the participant's current capacity and the ZPD.

270

### 271 *Alignment of system components*

272 After program values are established, components within an activity should complement  
273 one another to promote the *Object* and *Outcomes*. As is often the case, the structure of  
274 components may not be aligned. Secondary contradictions help to illuminate this misalignment  
275 and may lead to subsequent changes within the activity system [20]. For example, subjects may  
276 not have sufficient skillsets to interact with *Mediating artifacts*, the *Division of labor* may not be  
277 aligned with the present *Community*, or program *Rules* and expectations may conflict with the  
278 personal values of the *Subject*. Conflicts between system components result in specific obstacles  
279 that are manifestations of fundamental tensions (primary contradictions) within the activity  
280 system [21]. Because of this origin, it is often best to address the source(s) of the conflict rather  
281 than simply the symptoms.

282

### 283 *Introduction of a new practice*

284 To help resolve secondary contradictions and address underlying primary contradictions,  
285 change must occur in the activity system. Tertiary contradictions are differences in the system  
286 that occur at temporal transitions [20], and program directors may be interested in examining  
287 them as they change various instructional activities or procedures. As new procedures are  
288 implemented, a transition to the more "advanced practice" may not be immediate [20, 21].

289 Understanding resistance to change may reveal additional information about primary  
290 contradictions and potentially lead to smoother tertiary transitions. Revisiting our previous  
291 example of the research proposal provides insight into how examining program change through  
292 the lens of CHAT might improve the adoption of intervention techniques. Although the research  
293 proposal was a *Mediating artifact* that was meant to increase communication between students  
294 and members of their research team, it was not acting as a living document that would be  
295 revisited throughout the summer. Adoption seemed to be limited by the *Rules*, scaffolding, and  
296 additional *Mediating artifacts*. For example, during the first few iterations, not all students  
297 experienced the same benefits from their research proposals. Students with more exploratory  
298 projects found themselves reworking their methods throughout the summer; their final product  
299 did not reflect their proposal. For these individuals, the *Rules* of their project and the creating of  
300 the proposal were misaligned. Additionally, after the first two weeks, there were no additional  
301 programmatic *Mediating artifacts* that connected research projects back to the proposal.

302 Had we used CHAT, we might have been able to identify sooner how the design of the  
303 proposals were misaligned with the foci of some research projects. However, lessons from the  
304 proposal were applied to the creation of our R workshop. We recognized the need to design a  
305 *Mediating artifact* that was commensurate with the skill levels of our students and aligned with  
306 the needs of their projects. Because the workshop was spread out over four sessions, students  
307 could continue to revisit the concepts at different stages of project development.

### 308 *Levels of examination within an REU program*

309 Our examples have focused primarily on student-level activity systems, but the same  
310 framework also can be applied to examine mentor and program levels (Figure 1). It can act as the  
311 focus of primary through tertiary contradictions, and can illuminate neighboring activity systems

312 at the student level. In CHAT, the latter, quaternary contradictions arise between adjacent  
313 activity systems, often triggered by tertiary contradictions [20, 21]. Transitions resulting in  
314 tertiary contradictions, such as we saw in the research proposal example, also may create  
315 disturbances between activity systems and some or all its neighbors. In the case of REUs,  
316 mentor- and program-level systems share the same *Object* but may differ in the structure of other  
317 components (Table I). Not only could the interactions between activity systems change, so too  
318 could the adjacent systems if there is enough overlap in system components.

319

## 320 **Applying the CHAT framework to REU research**

321

### 322 *Recruitment and Hiring Practices*

323 At one of the earliest stages of the program, a *primary contradiction* exists when we are  
324 selecting students for the program. We try to strike a balance between selecting students who  
325 appear to be best qualified (*i.e.*, most experienced) to conduct research and students who have  
326 the most to gain out of the experience. This conflict arises in part due to cultural biases of  
327 academic research in which success is measured through productivity. However, as mentors and  
328 educators, we also want to work with students who are willing to push beyond their comfort zone  
329 and maximize the impact of a research experience. At HF-SRPE, this *primary contradiction* is  
330 further complicated by the different stakeholders involved in the hiring process. Mentors  
331 advocate for their projects, funders push for students from certain institutions, demographics,  
332 academic majors, or skillsets, and program directors seek a lasting and cohesive identity for the  
333 program. Characterizing these various components and assessing if recruitment and hiring goals

334 are being met is difficult, especially when hundreds or even thousands of applications are  
335 reviewed in a scant few weeks.

336 Demographic data and quantifiable metrics such as GPA may be the easiest variables to  
337 gather and compare over time or across programs. However, for REU programs to evaluate the  
338 effectiveness of practices such as recruitment, application requirements, and selection criteria,  
339 the data collected need to be aligned with the context. This is where a meta-theoretical  
340 framework like CHAT can be used to identify and prioritize useful data to be collected (Figure  
341 3). Although it would be best to collect lines of evidence supporting each CHAT component, we  
342 would minimally expect to collect more informative characteristics about the individual  
343 (*Subject*), the priorities of the position (*Object*), the expectations of the hiring process (*Rules*),  
344 practices implemented in recruiting or selection (*Mediating artifacts*), and the hiring decision  
345 (*Outcome*). Rather than serving as a predictive theory about the hiring process (which could also  
346 be integrated into a research program), CHAT provides focus and clarity for understanding this  
347 complex system.

348

### 349 *Understanding variation in learning gains*

350 To make sense of assessments of learning gains, it is important to understand the  
351 educational contexts in which those gains were observed. Most concept inventories lack these  
352 contextual questions and require the education researcher to integrate this into the research  
353 design. Although concept inventories often are praised for their extensive reliability and validity  
354 testing, they usually are designed to assess traditional coursework and are rarely aligned with  
355 learning objectives of REU programs. For example, URSSA was developed to better capture the  
356 learning gains associated with undergraduate research experiences such as the REU program



357 [10]. However, criticisms of URSSA are that information is self-reported and measure mainly  
358 affective domains, (attitudes, feelings, motivation, *etc.*) rather than a direct assessment of  
359 knowledge.

360 If components of URSSA do align with specific research questions, CHAT can be used to  
361 inform data collection. One advantage of URSSA for the REU community is that supplemental  
362 questions are built into the survey platform in addition to the core questions related to learning  
363 gains. However, these questions, such as the demographics seen in Figure 4, rarely explain much  
364 of the variation in these gains nor are they consistently administered across programs. Although  
365 it would be ideal to align and characterize all seven components of the activity system with  
366 respect to learning gains (Figure 4), we hypothesize, at least for participants in HF-SRPE, that  
367 characterizing the skills and knowledge a student brings with them to the research experience  
368 (*Subject*), the resources available to the student during their research experience (*Mediating*  
369 *artifacts*), the level of support they received (*Division of labor*), and what success means given a  
370 student's research experience (*Object*) are likely going to be the most factors in explaining the  
371 variation in student learning gains.

372

### 373 *Assessing the Impact of REU Programs*

374 Feedback from previous REU participants suggest that mentored independent research is  
375 a formative experience for career development. Systematic, post-program tracking of REU  
376 participants is uncommon despite it being a legal requirement since 2010 (P.L. 111-478 §514).  
377 We annually survey past participants of HF-SRPE and data provide some support for long-term  
378 persistence and high rates of employment by HF-SRPE alumnae/i in STEM fields (Figure 5).  
379 However, we cannot account accurately for the distribution of non-responses, nor are we able to

380 determine specific effects of HF-SRPE on individual decisions to pursue STEM careers. Like  
381 many of our colleagues who work with REU students, we believe that mentored research  
382 experiences launch them into STEM careers, but we cannot predict where they would be without  
383 this experience. Logistical and ethical constraints prevent researchers from forming true control  
384 groups and require the use of quasi-experimental designs. Expansions of data collection efforts  
385 before and during REU programs would help to characterize students and their experiences.

386         Again, the systems approach of CHAT can be used to identify important aspects of the  
387 complex learning environment and overcome the limitations of other study designs. For example,  
388 we would predict that factors such as the skills and knowledge a student brings with them to the  
389 research program (*Subject*), the professional development opportunities available to them during  
390 their research experience (*Mediating artifacts*), the interactions students have with other  
391 members of the research community (*Community*), and the goal of the research experience  
392 (*Object*) could be very influential on the long-term persistence in STEM disciplines and careers  
393 (*Outcome*).

394

### 395 **Future Directions**

396         As evaluative research continues to develop within the REU community, we see CHAT  
397 as a guideline for programs to follow. It can help to identify and coordinate the type of  
398 information that should be collected so that knowledge can be transferred more easily between  
399 programs. Without CHAT, or a similar theoretical framework, we will continue to be limited in  
400 the extent to which we can transfer meaningful experiences and best practices to our colleagues  
401 in the larger REU community. Although there is certainly value to developing and implementing  
402 new interventions within individual programs, the often short-term nature of REU sites

403 highlights the need to evaluate what works and what doesn't, and disseminate this information to  
404 the broader scientific community lest we keep reinventing pedagogical wheels. Admittedly, not  
405 everything can be or should be quantified. The heterogeneity between REU programs provides  
406 many challenges for science-education researchers to study. CHAT should encourage more  
407 researchers to collaborate with other programs.

408 **Glossary**

409 **Affective domain:** One of the three Bloom's Taxonomy Learning Domains. Unlike the  
410 cognitive (knowledge-based) and psychomotor (action-based) domains, the affective domain  
411 examines the development of emotional characteristics such as attitudes, feelings, motivation,  
412 and values.

413 **CHAT:** Cultural-historical activity theory is a systems approach to understanding complex  
414 human phenomena by understanding conflicts between individual and cultural values. In an  
415 educational setting, this can help to frame the social construction of knowledge.

416 **Construct:** An abstraction that helps to conceptualize phenomena that cannot be directly  
417 observed.

418 **Concept Inventory:** A rigorously designed test (often multiple choice) that evaluates an  
419 individual's mastery of a particular topic. Incorrect responses often reflect common  
420 misconceptions and can be used to further distinguish the level of mastery of a topic.

421 **Evidence-based Practice:** Use of the current best evidence to inform pedagogical decisions.

422 **Instructional intervention:** An intentional program aimed at promoting a specific cognitive or  
423 affective goal.

424 **Instrument:** A scientifically validated survey or protocol for obtaining information from  
425 participants.

426 **HF-SRPE:** The Harvard Forest Summer Program in Ecology has received continued NSF REU  
427 funding since 1989. All authors have experience running this program and are providing insights  
428 and recommendations based on this experience: Ellison has been the Program Director since

429 2004, Patel has been the Program Coordinator since 2012, and McDevitt was an on-site proctor  
430 and evaluation-researcher in 2015 and 2016.

431 **REU:** NSF's Research Experiences for Undergraduates program funds sites (such as HF-SRPE)  
432 and individual students to participate in STEM research oppertunities.

433 **Scaffolding:** Structured education activites that allow student to progress towards deeper  
434 understanding and independence in the learning process.

435 **URE:** A generic acronym for undergraduate research experiences whereas REUs are NSF's  
436 branded programs.

437 **URSSA:** The Undergraduate Research Student Self-Assessment is an evaluation tool for REU  
438 programs whose use is required by NSF.

439 **ZDP:** The zone of proximate development is the area between a student can learn with help and  
440 without help.

A)

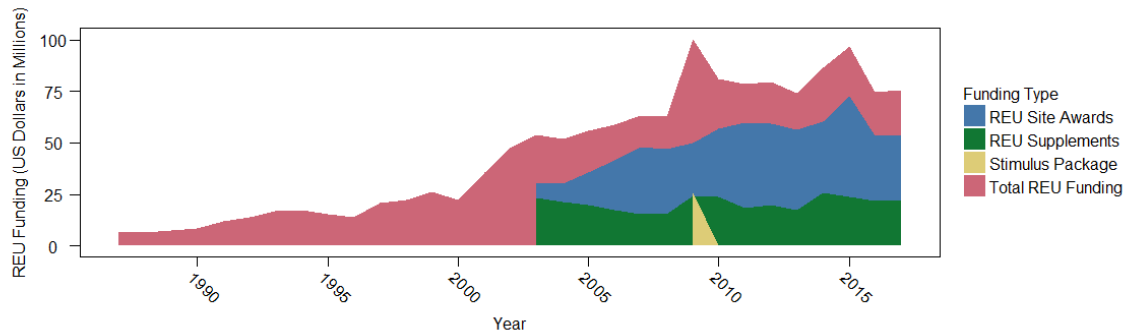

B)

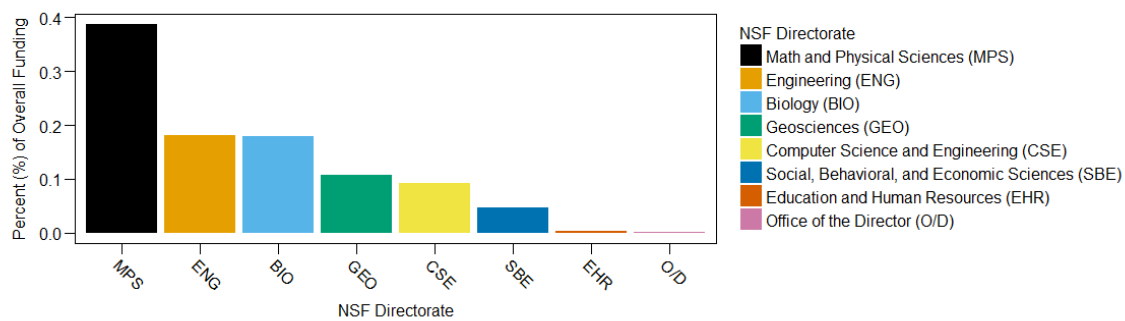

441 **Figure 1. Funding for Research Experiences for Undergraduates (REU) programs.** Support  
442 for REU programs based on A) yearly congressional allocations and B) NSF directorate support.  
443 Funding data (2002-2017) was compiled based on yearly NSF congressional budget requests.  
444 Archives of REU awards ([nsf.gov/awardsearch/](https://www.nsf.gov/awardsearch/)) provided estimates for remaining years and  
445 directorate contributions.  
446

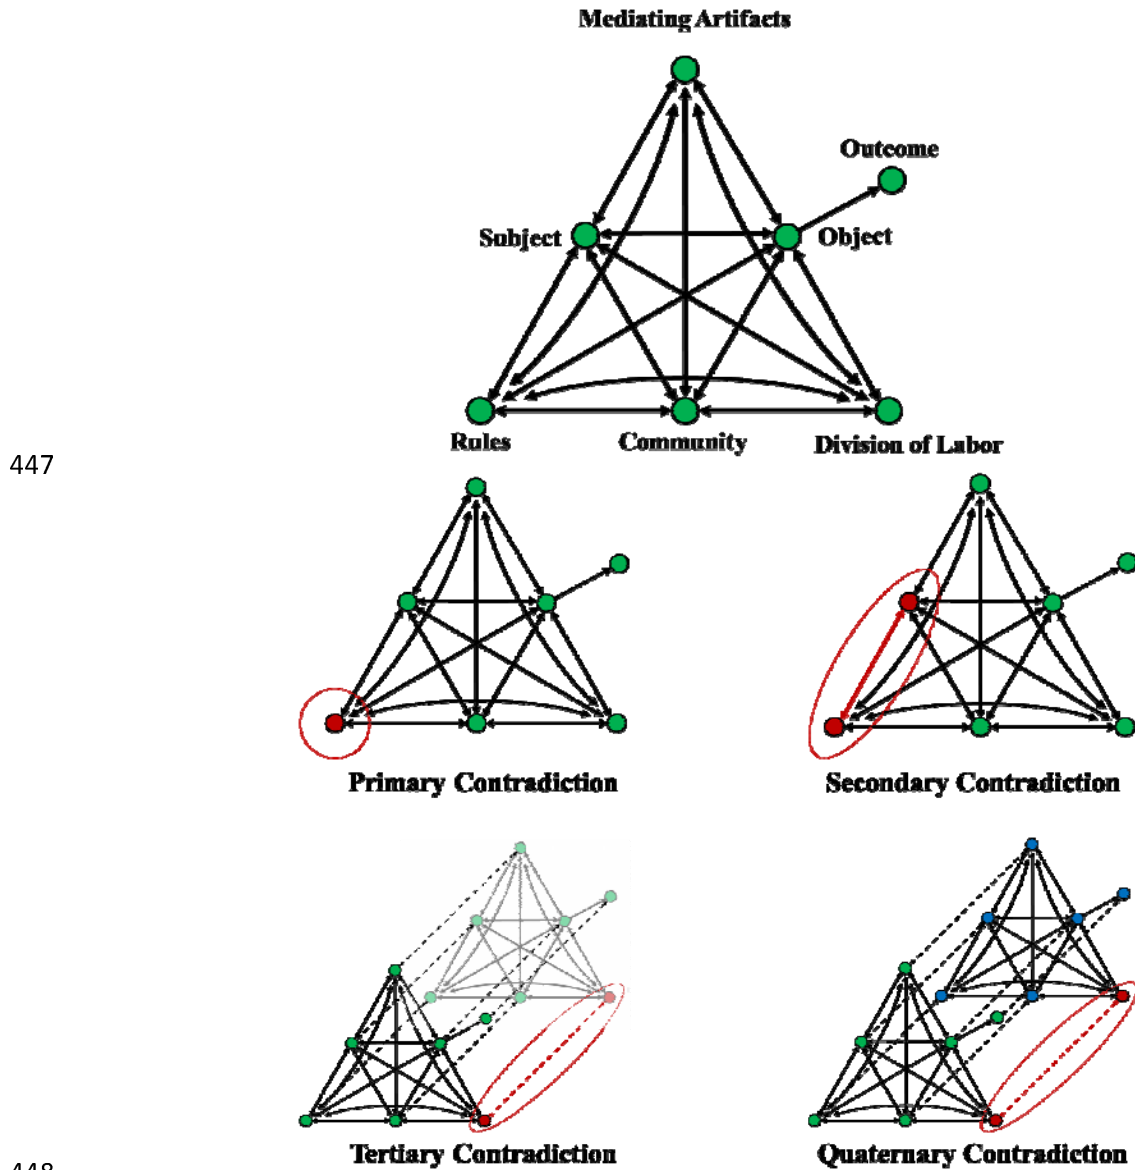

449 **Figure 2. CHAT's activity system components.** The activity triangle highlights A) how  
450 components interact with others within the system, and B) the contradictions that can be  
451 examined through CHAT.

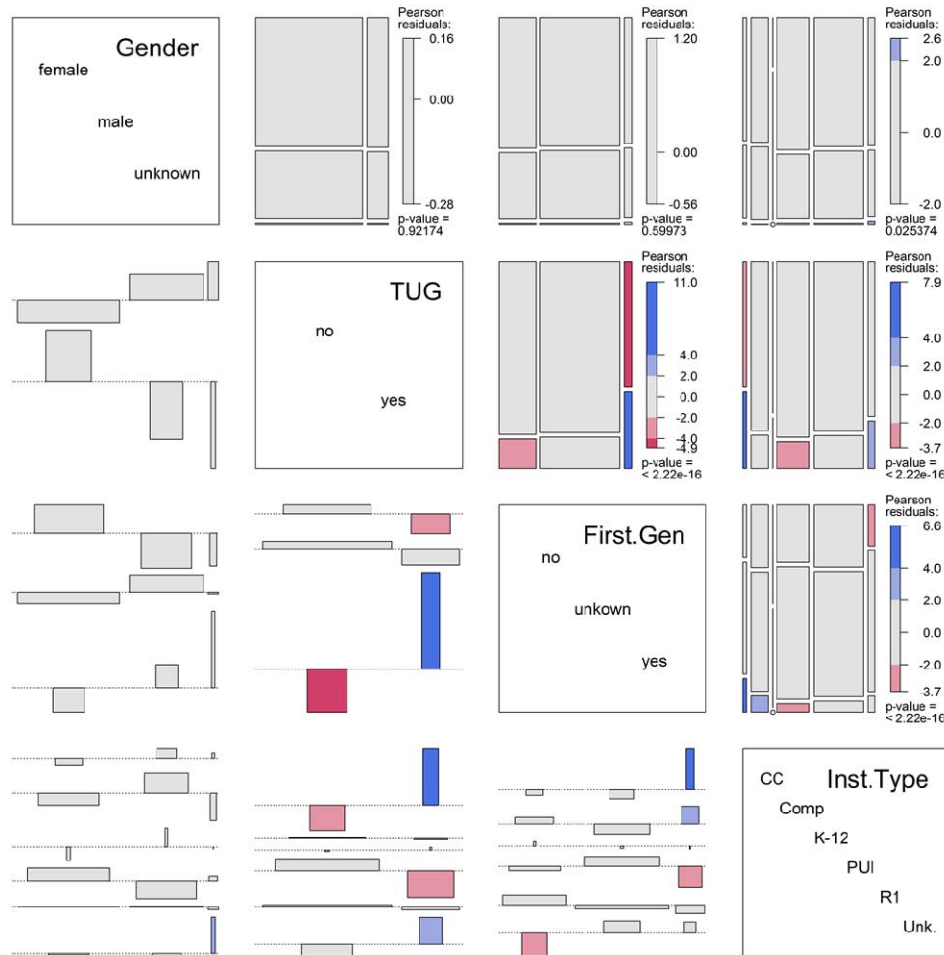

452

**Insights provided by current data**

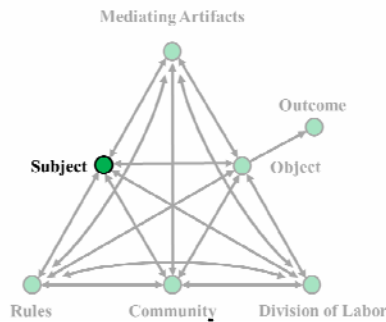

453

**Proposed explanation for the observed variation**

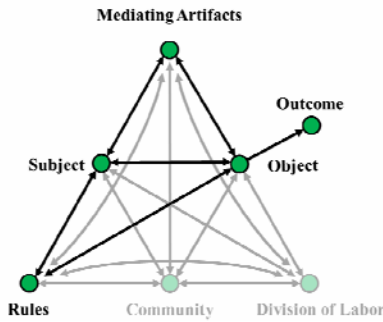

**Understanding equity in the hiring process using CHAT**

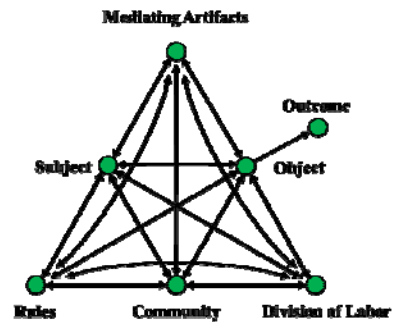

454 **Figure 3.** Commonly collected data during the recruitment and hiring process. The top panels  
 455 show mosaic plots illustrating relative proportions of students in different groups of interest to  
 456 students, program directors, programs, and funders. Significant positive (blue) and negative (red)



457 pairwise correlations are indicated. TUG: Student from a group traditionally under-represented in  
458 science; First.Gen: Student who is the first in their family to attend college or university;  
459 Inst.Type: type of institution, including community college (CC), Comprehensive university  
460 (Comp), K-12 (kindergarten through high school), PUI (primarily undergraduate institution), R1  
461 (research-1 university), and Unk (unknown or not applicable). The CHAT activity triangles  
462 illustrate how components are assessed with current frameworks (left) or could be assessed  
463 within a full CHAT framework.

464

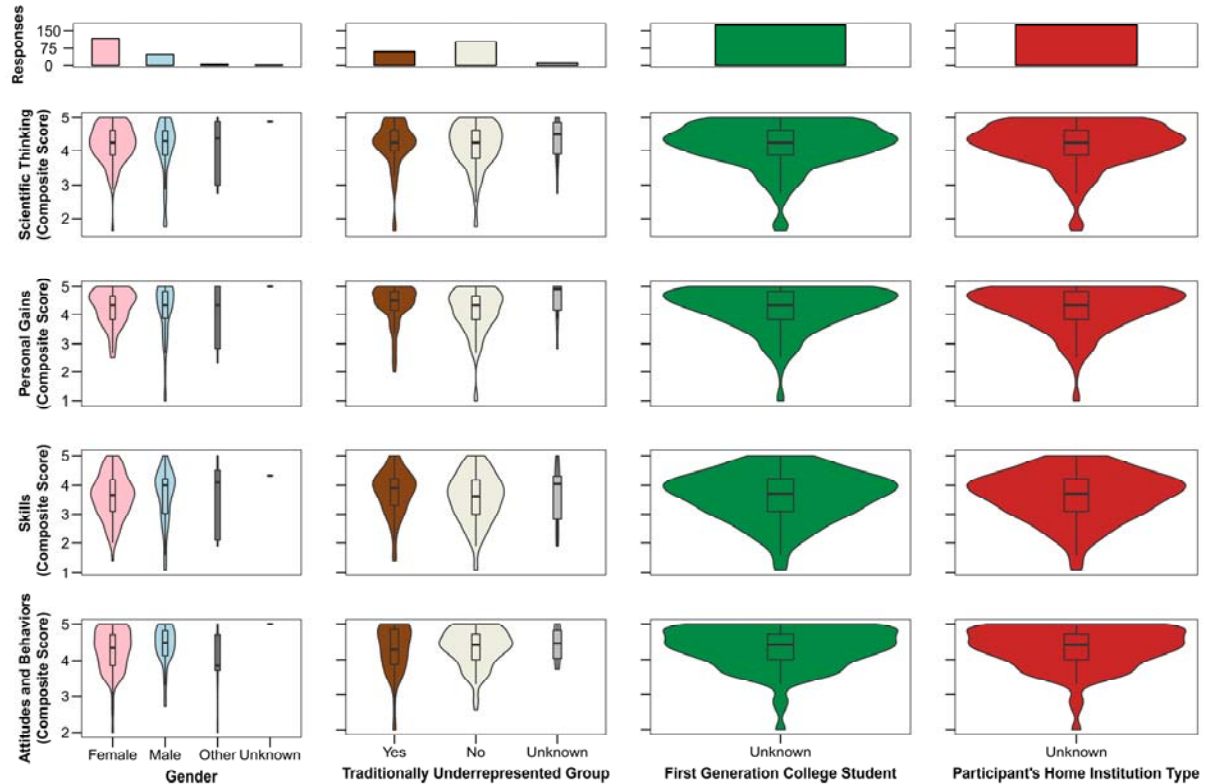

465

**Insights provided by current data**

**Proposed explanation for the observed variation**

**Understanding differences in learning gains using CHAT**

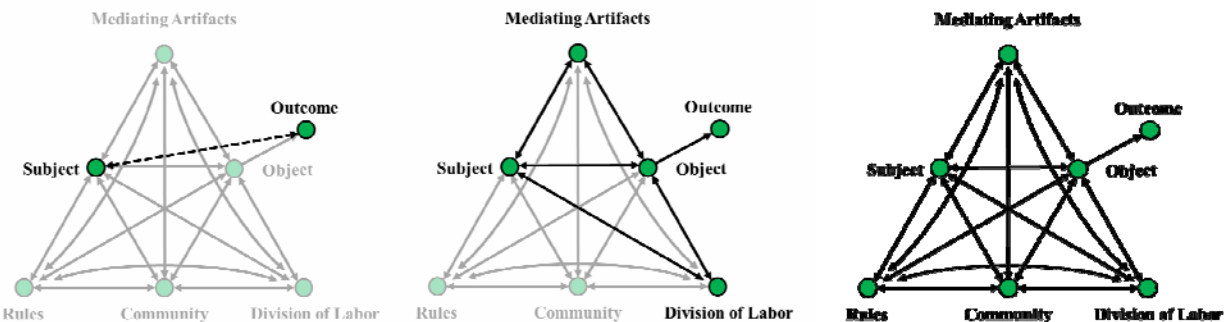

466

467 **Figure 4.** Commonly collected data when assessing learning gains. The top panels show changes

468 in scientific thinking, personal gains in overall confidence in doing research, research skills, and

469 attitudes and behaviors about doing research. Values range from 1 (low) to 5 (high) for all

470 variables. The total number of participants in the different groups are shown in the top row; in

471 the other panels, violin plots show the distribution of the data with inset box plots illustrating

472 median, quartile, and upper and lower deciles of the data. More detailed analysis of these data,

473 collected from pre/post surveys given annually to HF-SRPE students are presented in [13]. The  
474 CHAT activity triangles illustrate how components are assessed with current frameworks (left)  
475 or could be assessed within a full CHAT framework.

476

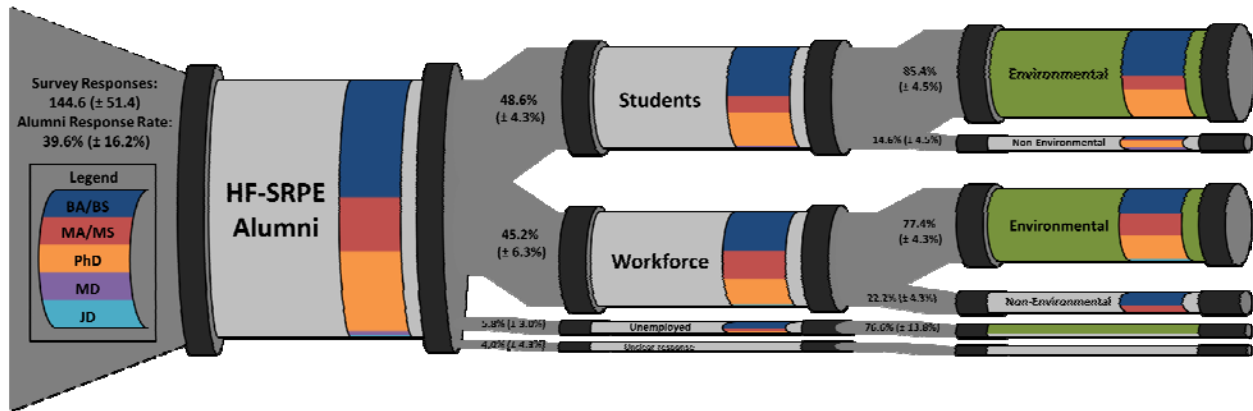

477

478

479

480

481

482

483

**Insights provided by current data**

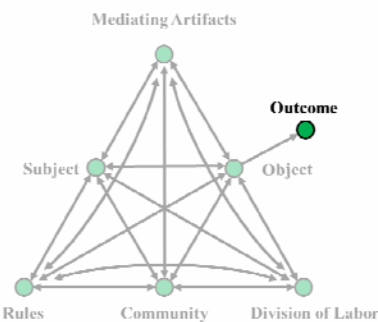

**Proposed explanation for the observed variation**

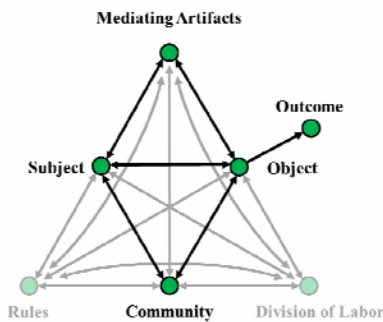

**Understanding the impact of a REU program using CHAT**

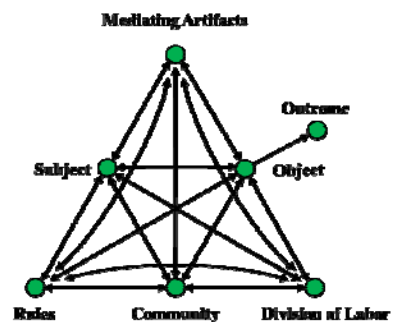

**Figure 5.** HF-SRPE career outcomes. Annual alumni surveys were sent to alumni (cohorts from 2001 onward) between 2012-2016. Averages of yearly snapshots reveal that alumni peruse/receive environmental/ecological related graduate degrees and continue to use these disciplines during their careers. Further information is required to determine the level of impact HF-SRPE had on these outcomes. The CHAT activity triangles illustrate how components are assessed with current frameworks (left) or could be assessed within a full CHAT framework.

484 **References**

- 485 1. Beninson, L.A. et al. (2011) Evaluation of the Research Experiences for Undergraduates  
486 (REU) Sites Program. *CUR Quarterly* 32 (1), 43-48.
- 487 2. Linn, M.C. et al. (2015) Undergraduate research experiences: Impacts and opportunities.  
488 *Science* 347 (6222), 1261757.
- 489 3. Kuh, G.D., High-impact educational practices: What they are, who has access to them, and  
490 why they matter, Association of American Colleges and Universities, Washington, DC,  
491 2008.
- 492 4. Neckers, D. (1982) The threat to undergraduate research. *J. Chem. Educ* 59 (4), 329.
- 493 5. Kardash, C.M. (2000) Evaluation of undergraduate research experience: Perceptions of  
494 undergraduate interns and their faculty mentors. *Journal of educational psychology* 92  
495 (1), 191.
- 496 6. Liang, B. et al. (2002) Mentoring College-Age Women: A Relational Approach. *American*  
497 *Journal of Community Psychology* 30 (2), 271-288.
- 498 7. Gregerman, S.R. et al. (1998) Undergraduate student-faculty research partnerships affect  
499 student retention. *The Review of Higher Education* 22 (1), 55-72.
- 500 8. Foertsch, J. et al. (2000) Summer research opportunity programs (SROPs) for minority  
501 undergraduates: A longitudinal study of program outcomes, 1986-1996. *Council of*  
502 *Undergraduate Research Quarterly* 20 (3), 114-119.
- 503 9. Nnadozie, E. et al. (2000) Undergraduate Research Internships and Graduate School Success.
- 504 10. Hunter, A.B. et al. (2009) URSSA: Evaluating student gains from undergraduate research in  
505 the sciences. *CUR Quarterly* 29 (3), 15-19.

- 506 11. BIO REU PI Workshop 2010, in: Christian, A. and Hannigan, R. (Eds.) BIO REU  
507 Leadership Committee, Arlington, VA, 2010.
- 508 12. National Research Council. (2013) Education for life and work: Developing transferable  
509 knowledge and skills in the 21st century, National Academies Press.
- 510 13. Kumar, S. and Hsiao, J.K. (2007) Engineers learn “soft skills the hard way”: Planting a seed  
511 of leadership in engineering classes. *Leadership and Management in Engineering* 7 (1),  
512 18-23.
- 513 14. McDevitt, A.M. et al. (2016) Insights into student gains from undergraduate research using  
514 pre-and post-assessments. *BioScience* 66 (12), 1070-1078.
- 515 15. R Core Team. (2016) R: A Language and Environment for Statistical Computing, R  
516 Foundation for Statistical Computing.
- 517 16. Roth, W.M. and Lee, Y.J. (2007) “Vygotsky’s neglected legacy”: Cultural-historical activity  
518 theory. *Review of educational research* 77 (2), 186-232.
- 519 17. Cole, M. and Engeström, Y. (1993) A cultural-historical approach to distributed cognition.  
520 *Distributed cognitions: Psychological and educational considerations*, 1-46.
- 521 18. Talbot, R. et al., Theoretically Framing a Complex Phenomenon: Student Success in Large  
522 Enrollment Active Learning Courses, *Physics Education Research Conference*  
523 *Proceedings*, 2016, pp. 344-347.
- 524 19. Yamagata-Lynch, L.C. (2010) *Understanding cultural historical activity theory*, Springer.
- 525 20. Engestrom, Y. (1987) *Learning by expanding: An activity-theoretical approach to*  
526 *developmental research*, Orienta-Konsultit.
- 527 21. Foot, K. and Groleau, C. (2011) Contradictions, transitions, and materiality in organizing  
528 processes: An activity theory perspective. *First Monday* 16 (6).

- 529 22. Vygotsky, L. (1987) Zone of proximal development. *Mind in society: The development of*  
530 higher psychological processes 5291, 157.
